# Supplementary material for: Patient and hospital determinants of primary percutaneous coronary intervention in England, 2003–2013
Source: HighWire-hosted journal article supplement (doi:10.1136/heartjnl-2015-308616), 2016-01-05
Supplement: heartjnl-2015-308616supp.pdf [file heartjnl-2015-308616supp.pdf]

## Appendix

### Patient and hospital determinants of primary percutaneous coronary intervention in England, 2003-13

#### Section 1: Supporting References for Methods

##### Euclidean Distance

Although Euclidian distance may be underestimated when compared with road based measures, without knowledge of people's mode of transport and whether or not their journey was from home, Euclidean distance provides a good approximation of the proximity of the patient to the hospital.[1]

##### Intraclass Correlation Coefficient (ICC)

To assess the degree of variation in PPCI utilisation rates attributed to the trust level (and not explained by the model), we obtained an approximation to the intraclass correlation coefficient (ICC) from a multilevel linear regression model which used PPCI rates as the outcome variable, rather than from a multilevel Poisson model for which the calculation of the ICC is not trivial, particularly after multiple imputation.[2] Model estimates from both models were compared for consistency.

## Section 2: Multiple Imputation

**Table S1.** Imputation model specification.

Multiple imputation by chained equations (MICE) was used to generate 10 imputed datasets. The imputation strategy details are provided in the table below.

| <b>Variable</b>                                 | <b>Variable Type</b>   | <b>Imputation method</b>                            |
|-------------------------------------------------|------------------------|-----------------------------------------------------|
| Age                                             | Continuous, non-normal | Predictive mean matching                            |
| Index of multiple deprivation score             | Continuous, non-normal | Predictive mean matching                            |
| Ethnicity                                       | Categorical            | Polytomous regression                               |
| Sex                                             | Binary                 | Logistic regression                                 |
| Distance to hospital                            | Continuous, non-normal | Predictive mean matching                            |
| Total beds at hospital                          | Continuous, non-normal | Predictive mean matching                            |
| Number of interventional cardiologists          | Continuous, non-normal | Predictive mean matching                            |
| PPCI Service 24 hours a day versus daytime only | Binary                 | Logistic regression                                 |
| Number of visiting cardiologists                | Continuous, non-normal | Predictive mean matching                            |
| Diabetes Mellitus                               | Binary                 | Default imputation (missing set to no).             |
| Previous hypertension                           | Binary                 | Default imputation (missing set to no).             |
| Previous hypercholesterolaemia                  | Binary                 | Default imputation (missing set to no).             |
| Previous MI                                     | Binary                 | Default imputation (missing set to no).             |
| Previous angina                                 | Binary                 | Default imputation (missing set to no).             |
| Peripheral vascular disease                     | Binary                 | Default imputation (missing set to no).             |
| Cerebrovascular disease                         | Binary                 | Default imputation (missing set to no).             |
| Chronic obstructive pulmonary disease/Asthma    | Binary                 | Default imputation (missing set to no).             |
| Congestive renal failure                        | Binary                 | Default imputation (missing set to no).             |
| Congestive cardiac failure                      | Binary                 | Default imputation (missing set to no).             |
| Previous PCI                                    | Binary                 | Default imputation (missing set to no).             |
| Previous CABG                                   | Binary                 | Default imputation (missing set to no).             |
| Family history of chronic heart disease         | Binary                 | Default imputation (missing set to no).             |
| Smoking status                                  | Binary                 | Default imputation (missing set to no).             |
| Primary PCI                                     | Continuous             | No imputation required - outcome/auxiliary variable |
| Year                                            | Continuous             | No imputation required - predictor variable         |

**Table S2.** Complete case analysis and multiple imputation analysis of adjusted incidence rate ratios (IRRs) with 95% confidence intervals assessing the variation in utilisation of primary percutaneous coronary intervention (PPCI) by patient and trust level factors. England, 2003-2013.

|                                                       | Complete Cases   |         | Multiple Imputed Data |         |
|-------------------------------------------------------|------------------|---------|-----------------------|---------|
|                                                       | IRR (95% CI)     | P-value | IRR (95% CI)          | P-value |
| <b>Year</b>                                           | 1.13 (1.12-1.13) | <0.001  | 1.12 (1.11-1.12)      | <0.001  |
| <b>Age</b>                                            |                  |         |                       |         |
| <55                                                   | Ref              |         | Ref                   |         |
| 55-64                                                 | 1.00 (0.98-1.02) | 0.766   | 1.00 (0.98-1.01)      | 0.705   |
| 65-79                                                 | 0.99 (0.97-1.01) | 0.498   | 0.99 (0.97-1.01)      | 0.276   |
| 80+                                                   | 0.89 (0.87-0.92) | <0.001  | 0.88 (0.86-0.90)      | <0.001  |
| <b>Male gender</b>                                    | 1.02 (1.00-1.03) | 0.038   | 1.02 (1.00-1.03)      | 0.044   |
| <b>Distance to hospital in km</b>                     |                  |         |                       |         |
| <6                                                    | Ref              |         | Ref                   |         |
| 6-15                                                  | 1.02 (1.00-1.04) | 0.123   | 1.01 (0.99-1.03)      | 0.192   |
| 16-29                                                 | 1.02 (0.99-1.04) | 0.187   | 1.02 (1.00-1.05)      | 0.037   |
| 30+                                                   | 0.95 (0.92-0.97) | <0.001  | 0.96 (0.93-0.98)      | 0.001   |
| <b>Family history of chronic heart disease</b>        | 1.02 (1.00-1.03) | 0.054   | 1.01 (1.00-1.03)      | 0.085   |
| <b>Previous acute myocardial infarction</b>           | 0.96 (0.93-0.98) | 0.001   | 0.95 (0.93-0.98)      | <0.001  |
| <b>Previous chronic cardiac failure</b>               | 0.85 (0.79-0.91) | <0.001  | 0.86 (0.80-0.91)      | <0.001  |
| <b>Previous angina</b>                                | 0.97 (0.94-0.99) | 0.009   | 0.96 (0.94-0.98)      | 0.001   |
| <b>Diabetes mellitus</b>                              | 0.96 (0.94-0.99) | 0.001   | 0.96 (0.94-0.98)      | <0.001  |
| <b>Chronic renal failure</b>                          | 0.91 (0.86-0.96) | <0.001  | 0.90 (0.86-0.95)      | <0.001  |
| <b>Previous PCI</b>                                   | 1.09 (1.05-1.12) | <0.001  | 1.09 (1.05-1.12)      | <0.001  |
| <b>Previous CABG</b>                                  | 0.96 (0.92-1.01) | 0.124   | 0.96 (0.92-1.01)      | 0.130   |
| <b>Cerebrovascular disease</b>                        | 0.97 (0.93-1.00) | 0.082   | 0.96 (0.93-0.99)      | 0.012   |
| <b>Smoker</b>                                         | 1.01 (1.00-1.03) | 0.094   | 1.01 (0.99-1.02)      | 0.205   |
| <b>Total number of beds at hospital</b>               |                  |         |                       |         |
| <700                                                  | Ref              |         | Ref                   |         |
| 700-999                                               | 0.90 (0.85-0.94) | <0.001  | 0.99 (0.95-1.04)      | 0.802   |
| 1000+                                                 | 0.86 (0.81-0.92) | <0.001  | 0.92 (0.88-0.97)      | 0.001   |
| <b>Number of interventional cardiologists</b>         |                  |         |                       |         |
| <5                                                    | Ref              |         | Ref                   |         |
| >5                                                    | 1.28 (1.24-1.33) | <0.001  | 1.35 (1.31-1.39)      | <0.001  |
| <b>Number of visiting cardiologists</b>               |                  |         |                       |         |
| 0                                                     | Ref              |         | Ref                   |         |
| 1-5                                                   | 1.41 (1.36-1.46) | <0.001  | 1.39 (1.35-1.44)      | <0.001  |
| 6+                                                    | 1.58 (1.51-1.65) | <0.001  | 1.42 (1.36-1.48)      | <0.001  |
| <b>PPCI offer</b>                                     |                  |         |                       |         |
| Daytime only (9-17)                                   | Ref              |         | Ref                   |         |
| 24 hours service 7 days a week                        | 2.85 (2.74-2.96) | <0.001  | 2.59 (2.50-2.68)      | <0.001  |
| <b>Hospital teaching status (university hospital)</b> | 1.09 (0.99-1.21) | 0.074   | 1.01 (0.93-1.10)      | 0.818   |

Abbreviations: CABG – Coronary artery bypass graft; IMD – Index of multiple deprivation; IRR – Incidence rate ratio; PPCI – Primary percutaneous coronary intervention

### Section 3: Overdispersion

Overdispersion was checked by comparing a Poisson and negative binomial regression model using the Akaike's information Criterion (AIC) and Bayesian Information Criterion (BIC). Poisson regression was chosen in favour of negative binomial regression as the AIC and BIC were minimised for the Poisson model.

**Table S3:** Model comparison of final Poisson and negative binomial models after imputation

| <b>Model</b>            | <b>AIC</b> | <b>BIC</b> |
|-------------------------|------------|------------|
| Poisson model           | 225576.7   | 225834     |
| Negative binomial model | 225635     | 225892.3   |

### References

- 1 Shahid R, Bertazzon S, Knudtson ML, et al. Comparison of distance measures in spatial analytical modeling for health service planning. *BMC health services research* 2009;**9**:200.
- 2 Goldstein H, Browne W, Rasbash J. Partitioning variation in multilevel models. *Understanding Statistics: Statistical Issues in Psychology, Education, and the Social Sciences* 2002;**1**:223-31.
